# Supplementary material for: Temporal analysis of hippocampal CA3 gene coexpression networks in a rat model of febrile seizures
Source: PubMed Central journal article supplement (PMC5818071; doi:10.1242/dmm.029074), 2018-01-01
Supplement: dmm-11-029074-s1.pdf [file dmm-11-029074-s1.pdf]

**Table S1.** Functional enrichment analysis in modules that gain or lose connectivity after hyperthermic seizures at P12.

| <b>MODULE (GENES)</b> | <b>MODULE TYPE</b>          | <b>HUBS</b>                                                                  | <b>MAIN ENRICHED FUNCTIONS</b>                                                                                                                                                                                                                                                                   |
|-----------------------|-----------------------------|------------------------------------------------------------------------------|--------------------------------------------------------------------------------------------------------------------------------------------------------------------------------------------------------------------------------------------------------------------------------------------------|
| <b>Blue (367)</b>     | <b>Gain of connectivity</b> | Bcar1, Slc25a5, Entpd2, Zfp148, Gimap9, Srp72, Rarres1, Hspa9, Rassf2, Romo1 | Cell cycle, Endocytosis, Focal Adhesion, Regulation of Actin Cytoskeleton, EGFR Pathway, Apoptosis, Cellular response to stress, Autophagy, DNA replication, axonogenesis, neuron cell-cell adhesion                                                                                             |
| <b>Green (215)</b>    | <b>Gain of connectivity</b> | Abcb6, Exosc5, Rbm7, C1ql1, Uri1, Pycr2, Mpdz, Hdgfrp3, Cstf2, Nudt16l1      | Endocannabinoid signaling, Proteoglycans in cancer, PI3K-Akt pathway, GABAergic synapse, Focal Adhesion, Class I MHC mediated antigen processing, EPH-ephrin mediated repulsion of cells, oxidative phosphorylation, cell projection organization, positive regulation of neuron differentiation |
| <b>Magenta (160)</b>  | <b>Gain of connectivity</b> | Slc4a2, Zfp407, Nes, Etv3, Cd6, Glrx2, Phb, Cln2, Ccnf, Kcnk2                | Proteoglycans, FoxO pathway, MAPK pathway, Chromatin organization, Gastrin-CREB signaling pathway via PKC and MAPK, Regulation of synaptic transmission, regulation of membrane potential                                                                                                        |
| <b>Salmon (132)</b>   | <b>Gain of connectivity</b> | Cct5, Col1a2, Mien1, Mettl2b, Mxi1, Foxe1, Cfl1, Rreb1, Hyal3, Cdhr1         | Oxidative phosphorylation, TGF- $\beta$ Pathway, Cell cycle, NF- $\kappa$ B activation, Ion channel transport, response to IL-1, Wnt pathway, apoptosis, actin cytoskeleton organization, stem cell maintenance                                                                                  |
| <b>Darkred (97)</b>   | <b>Less preserved</b>       | Nefl, Ssbp3, Epm2aip1, Sat1, Psmg4, Cmas, Srgap3, Zc3h18, Ctss, Scml4        | p53 pathway, HIF-1 pathway, Neurotrophin pathway, Wnt pathway, Apoptosis, Activation of NMDA receptor, Hemostasis, Signaling by FGFR, Cell differentiation, axonogenesis                                                                                                                         |
| <b>Royalblue (98)</b> | <b>Less preserved</b>       | Tmem212, Tbkbp1, Nxph1, Adcyap1, Fcgr1a, Tspyl4, Eif4ebp1, Aars, Mal2, Apex1 | PI3K-Akt-mTOR-signaling, EPH-Ephrin signaling, Axon guidance, SLC-mediated transmembrane transport, Signaling by VEGF, negative regulation of neuron death, neuron projection development, neurogenesis                                                                                          |
| <b>Grey60 (106)</b>   | <b>Less preserved</b>       | Ddx39b, Ap2s1, Ddx24, Atg16l1, Commd4, Acin1, Bloc1s2, Eif3e, Tpm3, Chmp4b   | Calcium Regulation, Integrin-mediated cell adhesion, Focal Adhesion, PI3K-Akt-mTOR-signaling, Signaling by EGFR, vesicle-mediated transport, cellular response to stress, regulation of vasculature development                                                                                  |
| <b>Darkgreen (97)</b> | <b>Less preserved</b>       | Prpf40a, Sort1, Cd33, Uqcr1, Smarca4, Ubc, Rnf187, Gdi1, Cript, Otx1         | Cholinergic synapse, potassium channels, Signaling by Wnt, mitotic cell cycle phase transition, T cell activation, neuron differentiation                                                                                                                                                        |

**Table S2.** Functional enrichment analysis in modules that gain or lose connectivity after hyperthermic seizures at P30.

| <b>MODULE (GENES)</b>  | <b>MODULE TYPE</b>          | <b>HUBS</b>                                                                   | <b>MAIN ENRICHED FUNCTIONS</b>                                                                                                                                                                                                                                                                                      |
|------------------------|-----------------------------|-------------------------------------------------------------------------------|---------------------------------------------------------------------------------------------------------------------------------------------------------------------------------------------------------------------------------------------------------------------------------------------------------------------|
| <b>Blue (345)</b>      | <b>Gain of connectivity</b> | Slc30a5, Hypk, Ankrd33b, Axin1, Arv1, Inip, Dscr3, Ptp4a3, Zfyve1, Acy3       | Protein processing in endoplasmic reticulum, Hippo pathway, Wnt pathway, apoptosis, Chemokine receptors bind chemokines, L1CAM interactions, myeloid cell differentiation, actin filament organization, regulation of neuron apoptotic process                                                                      |
| <b>Brown (301)</b>     | <b>Gain of connectivity</b> | Osm, B2m, Wbp4, Spata18, Retsat, Pomt1, Olr546, Stra6, Pcdhga7, Usp5          | Parkinson's disease, Dopaminergic and cholinergic synapses, long term potentiation, TCA cycle, cellular metabolism, proteasome, autophagy, negative regulation of apoptosis, nervous system development, negative regulation of cell differentiation                                                                |
| <b>Green (282)</b>     | <b>Gain of connectivity</b> | Chac2, Tmed7, Ivd, Tmx3, Smarcb1, Gmpr, Sav1, Ndufb2, Cpt1a, Sqstm1           | Glutamatergic synapse, GABAergic synapse, Ubiquitin-mediated proteolysis, Metabolic pathways, Oncostatin M Pathway, DNA damage response, Class I MHC mediated antigen processing, cell junction assembly, neuron projection development, synaptic transmission                                                      |
| <b>Lightcyan (165)</b> | <b>Gain of connectivity</b> | Tmem171, R3hdml, Chd5, Pth2, Eif1, Foxp3, Gja8, Rap2a, Polr1b, Pik3r5         | Electron Transport Chain, Glutathione conjugation, DNA Repair, regulation of neuron differentiation, neurogenesis, calcium ion homeostasis                                                                                                                                                                          |
| <b>Magenta (202)</b>   | <b>Gain of connectivity</b> | Sapcd1, RalA, Olr567, Gpr137, Lace1, Creb3, Rabgga, Mum1, Med25               | Phospholipase D signaling pathway, Actin cytoskeleton organization, Gastrin-CREB signaling pathway, positive regulation of cell adhesion and chemotaxis, stem cell maintenance, positive regulation of neurogenesis, stem cell differentiation                                                                      |
| <b>Red (228)</b>       | <b>Gain of connectivity</b> | Tmem246, Sult4a1, Vps11, Psm8, Armc9, Dopey2, Prkar1b, Dctn2, Ankrd46, Pcyox1 | Synaptic vesicle, lysosome, Leukocyte transendothelial migration, glutamatergic synapse, Regulation of Actin Cytoskeleton, Neuronal System, MHC class II antigen presentation, signaling by VEGF, signaling by EGFR, synaptic transmission, neuron projection development, neuron apoptosis, neuron differentiation |
| <b>Darkgreen (137)</b> | <b>Less preserved</b>       | Chac1, Pif1, Hpcal4, Noxa1, Defb24, EphA10, Atp6ap11, Zfp516, Htr5b, Ncf1     | Axon guidance, Ras pathway, Long-term potentiation, Apoptosis, BDNF signaling pathway, IL-1 pathway, Cell Adhesion, EPH-Ephrin signaling, Innate immune pathway, Rho GTPase Effectors                                                                                                                               |
| <b>Pink (207)</b>      | <b>Less preserved</b>       | Sectm1b, Ube3d, Fam134b, Idh3g, Anapc13, S100b, Cpne8, Pgam1, Dpysl2, Itgb3bp | Synaptic transmission, glycolysis, oxidative phosphorylation, metabolism of amino acids, immune system, iron ion homeostasis, neuron migration, organic acid transport                                                                                                                                              |
| <b>Tan (191)</b>       | <b>Less preserved</b>       | Wfdc10, Gpd1l, Sfrp5, Baiap2, Myo5b, Tmem229b, Bsdcl1, Nup62, Thop1, Cacna1e  | Wnt signaling pathway, MAPK pathway, Calcium signaling, Axon guidance, Neural Crest Differentiation, neuronal System, synaptic transmission, regulation of ion membrane transport, actin cytoskeleton organization, axon guidance                                                                                   |

**Table S3.** Functional enrichment analysis in modules that gain or lose connectivity after hyperthermic seizures at P60.

| MODULE (GENES)            | MODULE TYPE                                    | HUBS                                                                       | MAIN ENRICHED FUNCTIONS                                                                                                                                                                                                                          |
|---------------------------|------------------------------------------------|----------------------------------------------------------------------------|--------------------------------------------------------------------------------------------------------------------------------------------------------------------------------------------------------------------------------------------------|
| <b>Brown (249)</b>        | <b>Gain of connectivity and Less preserved</b> | Rmnd5b, Bop1, Actn1, Sec1415, Tmem25, Fkbp8, Acap3, Cacnb3, Cnrip1, Il16   | Focal adhesion, stem cell pluripotency, metabolism of lipids, positive regulation of lymphocyte proliferation, negative regulation of cell migration, neuron projection development                                                              |
| <b>Midnightblue (160)</b> | <b>Gain of connectivity</b>                    | Anxa7, Snd1, Klhdc3, C5ar1, Gosr2, Bpifb6, Or10ad1, Rpp30, Rps19, Atp6v0a1 | Synaptic vesicle, Glutamatergic synapse, BDNF signaling pathway, Neuronal System, Antigen processing: Ubiquitination & Proteasome degradation, Ion channel transport, synaptic transmission, neuronal plasticity                                 |
| <b>Red (212)</b>          | <b>Gain of connectivity</b>                    | Dctn1, Dapk3, Dgat1, Mus81, Unc45a, Rnft2, Dcaf15, Pomgnt2, Abcb8, Ogdh    | Hippo pathway, interleukin signaling, neural crest differentiation, Extracellular matrix organization, hippocampus development, innate immune response                                                                                           |
| <b>Turquoise (438)</b>    | <b>Gain of connectivity</b>                    | Tpd521l, Scx, Mx1, Ednra, Ano3, Dleu7, Slc7a3, Nr2f2, Eph5, Gpr155         | Calcium ion transport, cholinergic synapse, axon guidance, Wnt pathway, inflammatory regulation of TRP channels, Neuronal system, gastrin-CREB signaling pathway, Signaling by Robo, Potassium Channels, neuron migration, synaptic transmission |
| <b>Yellow (235)</b>       | <b>Gain of connectivity</b>                    | Bckdk, Rmdn1, Ninj1, Robo1, Tst, Dchs1, Galt, Lsm3, Olr733, Gja10          | Metabolic pathways, neuroactive ligand-receptor interaction, GABAergic synapse, Extracellular matrix organization, neuron projection development, synaptic transmission, neuron differentiation, neurogenesis                                    |
| <b>Greenyellow (176)</b>  | <b>Less preserved</b>                          | Ptprt, Armcx1, Tpcn1, Ube2m, Acbd5, Mta2, Celf4, Taok2, Pomgnt1, Slc16a13  | Wnt pathway, p53 pathway, Axonal guidance, regulation of RNA splicing, neuron cell morphogenesis, regulation of protein ubiquitination, synaptic transmission                                                                                    |
| <b>Orange (114)</b>       | <b>Less preserved</b>                          | Olr1516, March9, Ache, Abcc6, Dusp9, Dynlt1, Sin3b, Sept2, Rnf182, Gltp    | Long-term potentiation, cholinergic synapse, axon guidance, Kit receptor signaling pathway, signaling by EGF, cell junction assembly, cell differentiation, positive regulation of cell migration                                                |
| <b>Skyblue (97)</b>       | <b>Less preserved</b>                          | Calr, Sobp, Acin1, Rabgap1, Nrgn, Epn1, Sstr4, Ring1, Scaf1, Sncb          | Endocytosis, Notch Pathway, Sphingolipid metabolism, ERBB signaling, nervous system development, small GTPase mediated signal transduction                                                                                                       |

**Table S4.** Functional enrichment analysis in modules that gain or lose connectivity after hyperthermic seizures at P120.

| MODULE (GENES)          | MODULE TYPE                 | HUBS                                                                      | MAIN ENRICHED FUNCTIONS                                                                                                                                                                                                                                                |
|-------------------------|-----------------------------|---------------------------------------------------------------------------|------------------------------------------------------------------------------------------------------------------------------------------------------------------------------------------------------------------------------------------------------------------------|
| <b>Brown (249)</b>      | <b>Gain of connectivity</b> | Dgkz, Armt1, Acp2, Robo2, Gria1, Ppp2r5c, Pard6a, Mast3, Scd2, Pdpk1      | Synaptic transmission, Long-term potentiation, Leukocyte transendothelial migration, Focal adhesion, Regulation of actin cytoskeleton, Rap1 pathway, Axon guidance, signaling by Wnt, Signaling by Robo, neuron projection development, neuron differentiation         |
| <b>Blue (264)</b>       | <b>Gain of connectivity</b> | Pdap1, Pcbd2, Eif3f, Npdc1, Rnf34, Ndufb3, Shank3, Ndufs5, Bmpr1b, Map3k7 | MAPK signaling pathway, Extracellular matrix organization, regulation of synaptic transmission, apoptosis, regulation of cell morphogenesis involved in differentiation, negative regulation of neurogenesis, neuron projection guidance, response to oxidative stress |
| <b>Pink (208)</b>       | <b>Gain of connectivity</b> | Cerk, Prpf8, Ipo13, Ncaph2, Sptan1, Apc2, Exosc7, Arhgdia, Exoc6b, Kdm3a  | Alzheimer's disease, Complement and coagulation cascades, Foxo signaling pathway, Phospholipase D signaling pathway, Toll-like receptor signaling pathway, regulation of actin cytoskeleton, Antigen processing, Wnt signaling pathway                                 |
| <b>Grey60 (128)</b>     | <b>Less preserved</b>       | Ciz1, Vps4b, Cryga, Gatad2a, Tnrc6a, Cybrd1, Med1, Casp7, Abcd4, Sbn2     | Fc gamma R-mediated phagocytosis, positive regulation of lymphocyte proliferation, positive regulation of lymphocyte activation, regulation of I-kappaB kinase/NF-kappaB signaling, cell projection organization, regulation of cell morphogenesis                     |
| <b>Skyblue (93)</b>     | <b>Less preserved</b>       | Polr1c, Ska3, Hyal2, Hmmer, Ttc21b, Avl9, Hacd2, Mecr, Vom1r81, Prrc1     | TNF-alpha NF-kB Pathway, Hyaluronic metabolism, regulation of Wnt pathway, negative regulation of neuron differentiation, actin filament organization, negative regulation of cell migration, regulation of MAPK activity                                              |
| <b>Lightgreen (125)</b> | <b>Less preserved</b>       | Tbx3, Ciapin1, Adprm, Scly, Atf4, Commd8, Sf3b3, Bpgm, Ccdc50, Stat1      | Metabolism, Extracellular matrix organization, regulation of anion transport, neuron projection development                                                                                                                                                            |

**Table S5.** List of primer sequences used for the quantitative real time polymerase chain reactions.

| <b>Gene</b>   | <b>Primer Code</b> | <b>Sequence (5' to 3')</b> |
|---------------|--------------------|----------------------------|
| <b>PTGIR</b>  | PTGIR FW           | TGGGACGATGCTGTGTGA         |
|               | PTGIR RV           | GAAAGCGTAGATGGAAGGCAA      |
| <b>SOX9</b>   | SOX9 FW            | AGGAAGCTGGCAGACCAGTA       |
|               | SOX9 RV            | ACGAAGGGTCTCTTCTCGCT       |
| <b>TRIP12</b> | TRIP12 FW          | CCAACCCAGAAATCAACCAGTC     |
|               | TRIP12 RV          | GATTTCCAACATGGCCCGGGAG     |
| <b>RHOX8</b>  | RHOX8 FW           | TGCCTGGACCCCTACTATTG       |
|               | RHOX8 RV           | CTGGCTGGCACATAGTCCTG       |
| <b>GAPDH</b>  | GAPDH FW           | GACATGCCGCCTGGAGAAAC       |
|               | GAPDH RV           | AGCCCAGGATGCCCTTTAGT       |

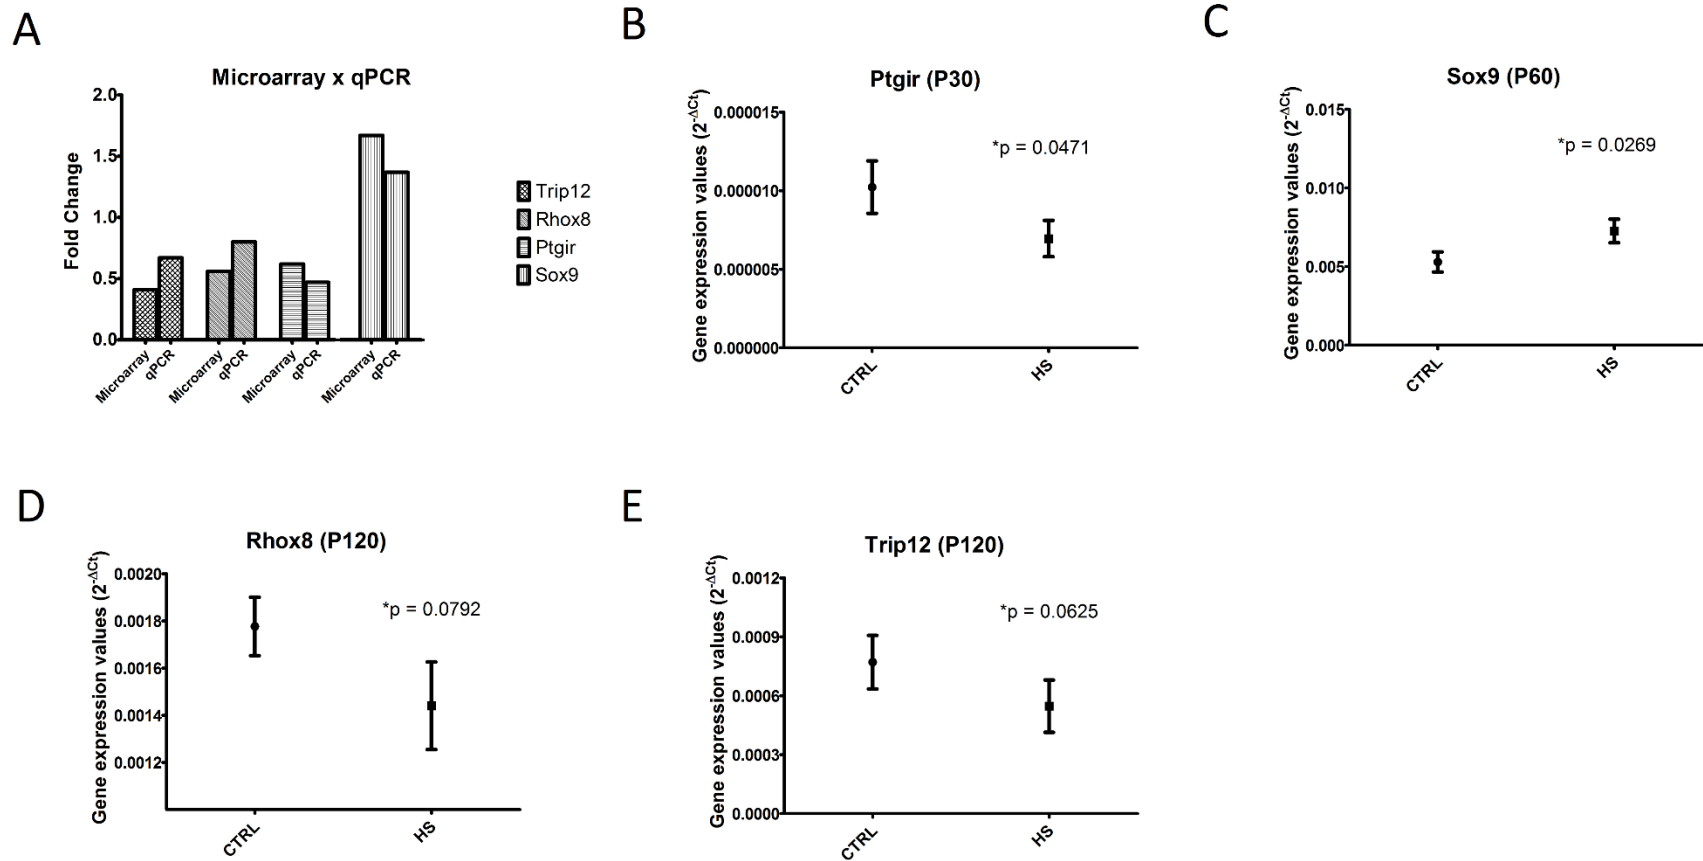

**Figure S1. Comparison of microarray and qPCR results for selected genes.** The genes Trip12, Rhox8, Ptgir and Sox9 were selected for validating microarray results using qPCR analysis.

## NETWORK ANALYSIS WORKFLOW

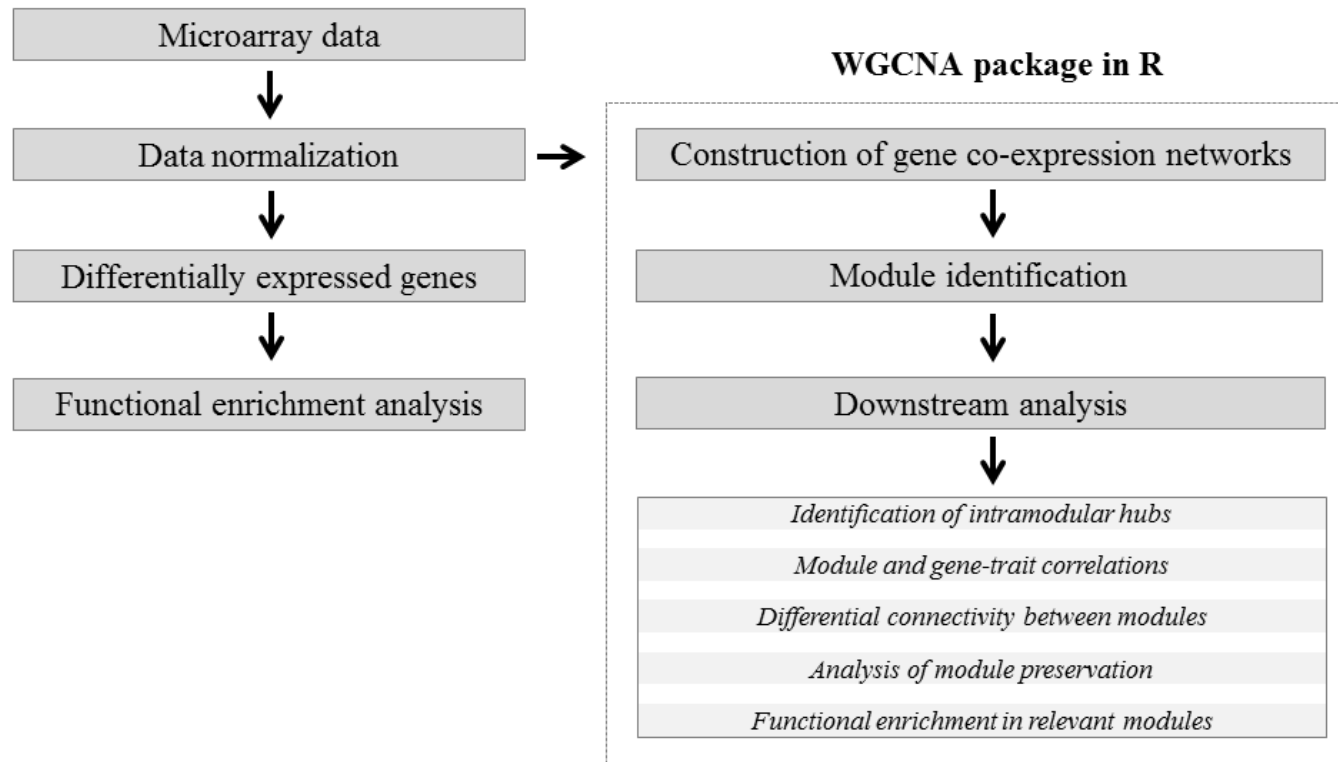

**Figure S2. Schematic representation of the network analysis workflow.** Microarray data was log<sub>2</sub>-transformed and normalized using lowess normalization. This data was used for weighted correlation network analysis. The network analysis consisted in building gene co-expression networks, identifying network modules and hubs, performing gene-trait correlations and examining module preservation and connectivity changes. Relevant modules were also functionally enriched to identify functions associated to hyperthermic seizures.
